# Supplementary material for: Stacking induced symmetry breaking and gap opening in Dirac half-metal MnF3
Source: Royal Society of Chemistry journal article supplement (doi:10.1039/d4cp04213a), 2025-01-01
Supplement: d4cp04213a1.pdf [file d4cp04213a1.pdf]

## Supplementary Information

### Stacking induced symmetry broken and gap opening in Dirac half-metal $\text{MnF}_3$

Wentai Xiang, Baozeng Zhou\*

*Tianjin Key Laboratory of Film Electronic & Communicate Devices, School of Integrated Circuit  
Science and Engineering, Tianjin University of Technology, Tianjin 300384, China*

\*Corresponding Authors

[baozeng@tju.edu.cn](mailto:baozeng@tju.edu.cn) (B. Zhou)

**Table. S1** Calculated formation energies of  $\text{MnF}_3$ ,  $\text{MnF}_4$  and  $\text{Mn}_2\text{F}_5$  along with this work and QOMD data.

| <b>System</b>                             | <b>This work (<math>E_f</math>)</b> | <b>QOMD data<sup>1</sup></b> |
|-------------------------------------------|-------------------------------------|------------------------------|
| <b><math>\text{MnF}_3</math></b>          | -1.93 eV                            | -2.74 eV                     |
| <b><math>\text{MnF}_4</math></b>          | -1.78 eV                            | -2.49 eV                     |
| <b><math>\text{Mn}_2\text{F}_5</math></b> | -2.13 eV                            | -2.69 eV                     |

- 1 S. Kirklin, J. E Saal, B. Meredig, A. Thompson, J. W Doak, M. Aykol, S. Rühl and C. Wolverton, *npj Computational Materials*, 2015, 1, 15010.

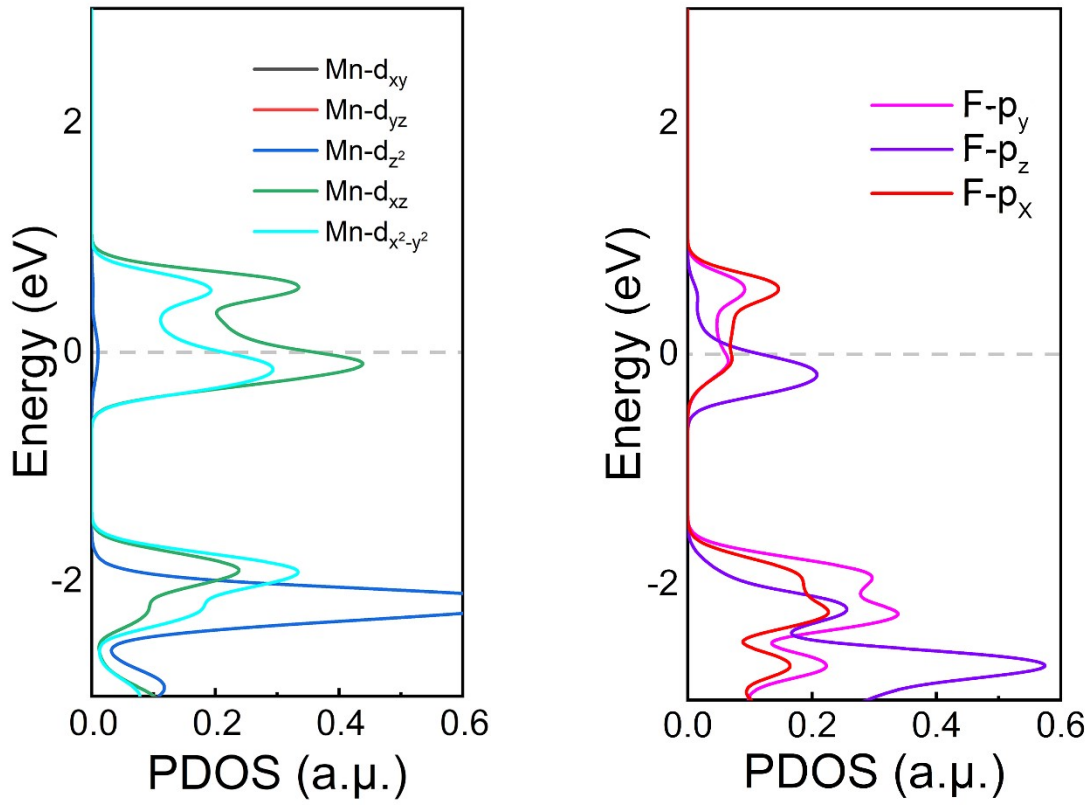

**Fig. S1.** PDOS of the spin-up channel in monolayer MnF<sub>3</sub>.

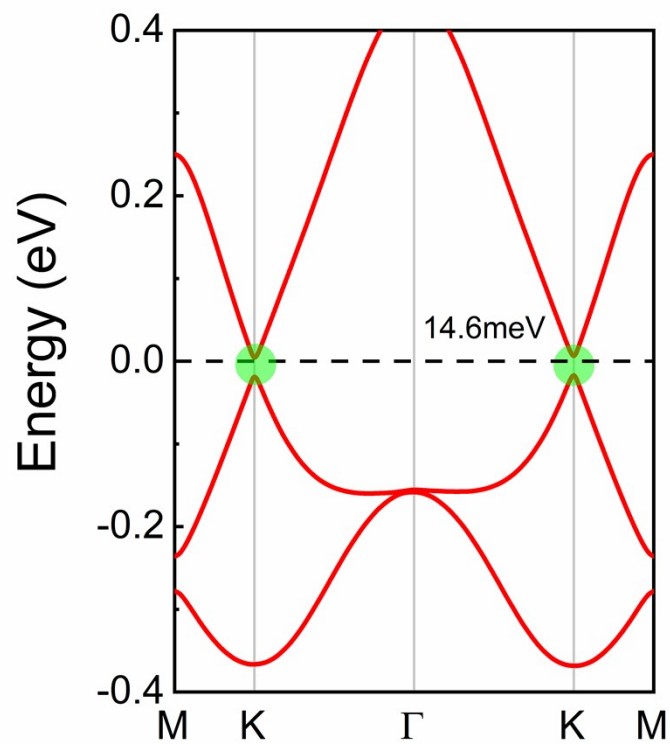

**Fig. S2** Band structure of the spin-up channel in monolayer MnF<sub>3</sub> with considering SOC.

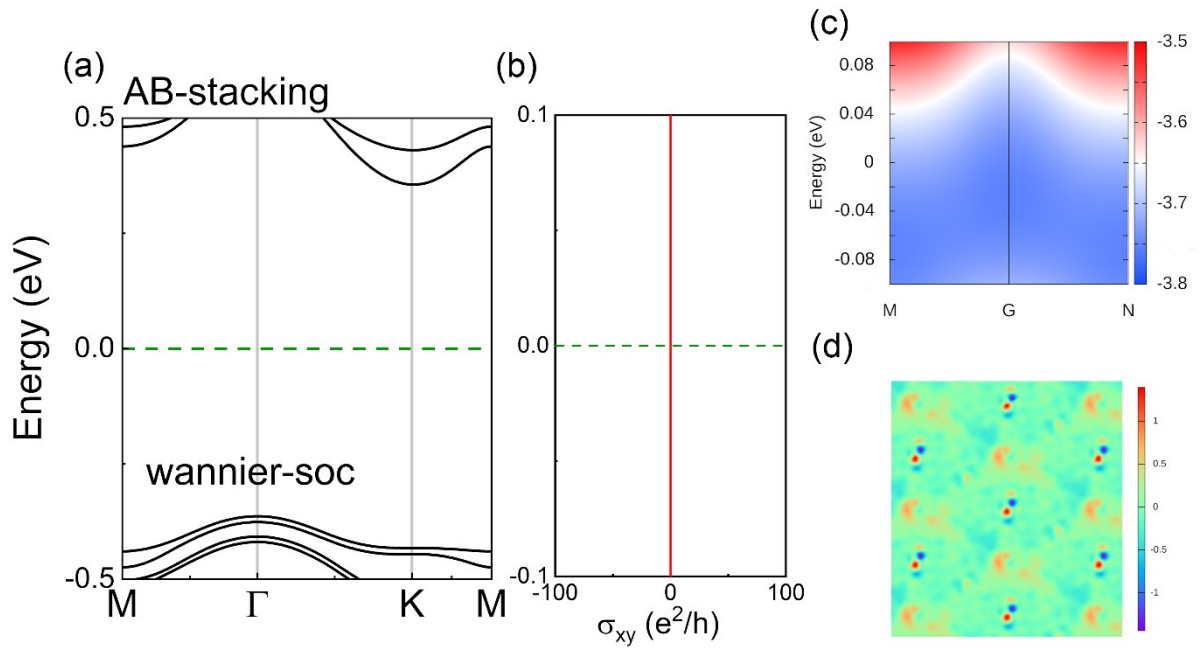

**Fig. S3** (a) Band structure of AB-stacking MnF<sub>3</sub> bilayer calculated using the MLWFs method with SOC. (b) The corresponding anomalous Hall conductivity ( $\sigma_{xy}$ ), (c) edge state of a semi-infinite sheet, and (d) the Berry curvature with SOC.

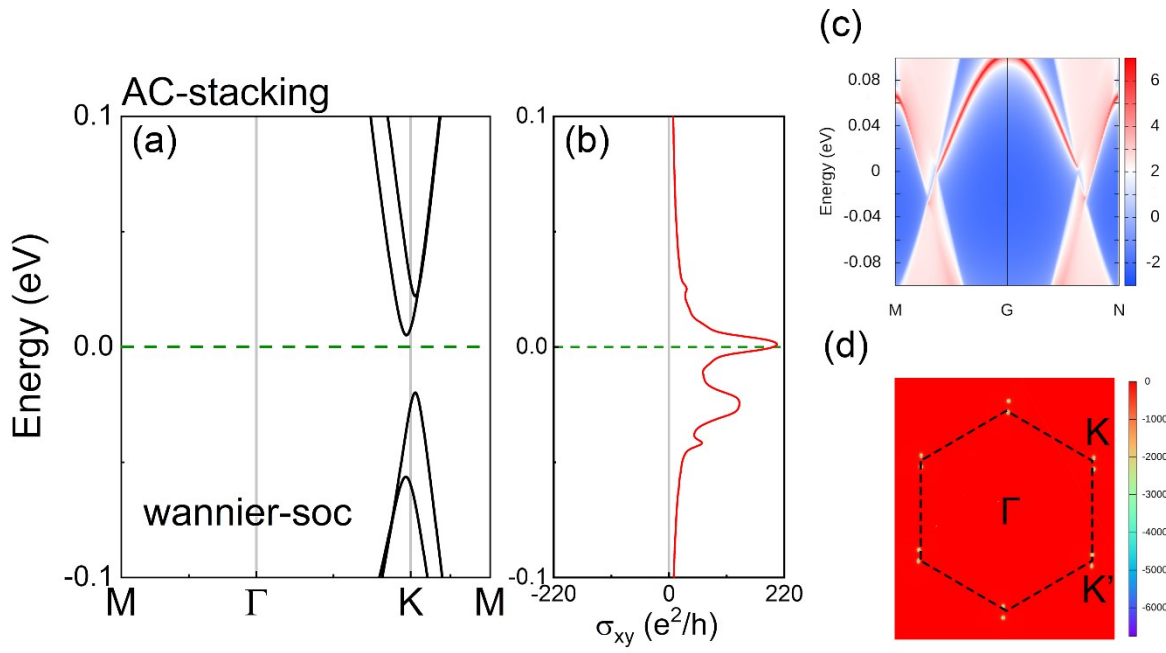

**Fig. S4** (a) Band structure of AC-stacking MnF<sub>3</sub> bilayer calculated using the MLWFs method with SOC. (b) The corresponding anomalous Hall conductivity ( $\sigma_{xy}$ ), (c) edge state of a semi-infinite sheet, and (d) the Berry curvature with SOC.
